# Supplementary material
Source: PubMed Central journal article supplement (PMC5983338)
Supplement: jci-128-97354-s144.pdf [file jci-128-97354-s144.pdf]

**Supplemental Figure 1. Pros1 expression by multiple tumor types is IFN $\gamma$  responsive and suppresses M1 gene expression.** **A.** Pros1 expression fold change in IFN $\gamma$  treated (24 hours) murine tumor cell lines as measured by qRT-PCR normalized to untreated B16F10 cells. (n=6, \*P < 0.05 relative to untreated, 2 independent replicates) **B.** Suppression of M1 gene expression in macrophages co-cultured with tumor cell lines determined by qRT-PCR. (n=6, \*P < 0.05 relative to untreated, †P < 0.05 M1 induced, 2 independent replicates) **C.** Pros1 concentration in tumor cell line conditioned medium after 24 hours measured by ELISA. (n=3) **D.** Pros1 expression in tumor cell lines measured by qRT-PCR. (n=5) Data are mean  $\pm$  SEM; P values calculated by 2-tailed Student's t-test.

**Supplemental Figure 2. Pros1 inhibits peritoneal macrophage M1 polarization** **A.** Raw qRT-PCR expression fold change of Pros1 mediated M1 suppression normalized to untreated samples rather than IFN $\gamma$ +LPS treatment as in Figure 1D. (n=6, \*P < 0.05 relative to untreated, †P < 0.05 relative to M1 induced, 2 independent replicates) Data are mean  $\pm$  SEM; P values calculated by 2-tailed Student's t-test.

**Supplemental Figure 3. Gas6 does not suppress M1 gene expression.** **A.** M1 induced macrophages treated with 200ng/ml Gas6. (n=5, ns = not significant) Data are mean  $\pm$  SEM; P values calculated by 2-tailed Student's t-test.

**Supplemental Figure 4. Temporal effects of Pros1 on M1 polarization.** **A.** Expression fold change of M1 associated gene expression 2 or 8 hours after induction of M1 polarization. (n=5, \*P < 0.05 relative to untreated, †P < 0.05 relative to M1 induced, respectively) Data are mean  $\pm$  SEM; P values calculated by 2-tailed Student's t-test. For the  $\Delta\Delta$ CT method, IFN $\gamma$ +LPS treated macrophages from the 8 hour timepoint were used as the reference standard.

**Supplemental Figure 5. Expression of M2 associated genes is not significantly altered by tumor secreted Pros1.** **A.** M2 gene expression of M1 induced macrophages co-cultured with B16F10 cells. (n=4, \*P < 0.05 relative to untreated, †P < 0.05 relative to M1 induced, ns = not significant) Data are mean  $\pm$  SEM; P values calculated by 2-tailed Student's t-test.

**Supplemental Figure 6. Pros1 inhibits thioglycollate-induced peritoneal macrophage M1 polarization** **A.** Raw qRT-PCR expression fold change of Pros1 mediated M1 suppression normalized to untreated samples rather than IFN $\gamma$ +LPS treatment as in Figure 1D. (n=8, \*P < 0.05 relative to untreated, †P < 0.05 relative to M1 induced, 2 independent replicates) Data are mean  $\pm$  SEM; P values calculated by 2-tailed Student's t-test.

**Supplemental Figure 7. Characterization of CRISPR-based Pros1 deletion in B16F10 cells.** **A.** BLAST comparison of BdP genomic sequence with Pros1 reference sequence. **B.** Domain diagram of murine Pros1 with location of targeted deletion. **C.** Expression change in mRNA 5' to the sequence deletion. (n=4, \*P < 0.05) **D.** MTT growth assay of parental B16F10, BdP, or BdP cell line treated with 1 $\mu$ g/ml Pros1. (n=4, ns = not significant) Data are mean  $\pm$  SEM; P values calculated by 2-tailed Student's t-test.

**Supplemental Figure 8. Flow cytometric analysis of TAM expression in M1 induced peritoneal macrophages.** **A.** TAM surface expression in M1 induced macrophages as measured by flow cytometry. Quantitative data is normalized to expression of untreated macrophages (n=5, \*P < 0.05 relative to untreated macrophages) Data are mean  $\pm$  SEM; P values calculated by 2-tailed Student's t-test.

**Supplemental Figure 9. TAM expression in macrophages isolated from TAM knock-out mice. A.** qRT-PCR of TAM receptors in macrophages from Axl, Tyro3 or Mer knock-out mice. (n=4, \*P < 0.05 relative to macrophages isolated from wt mice) **B.** Analytical flow cytometry of TAM receptors on macrophages isolated from Axl, Tyro3 or Mer knock-out mice. Quantitative data is normalized to expression of wildtype (wt) macrophages (n=4, \*P < 0.05 relative to wt peritoneal macrophages) Data are mean  $\pm$  SEM; P values calculated by 2-tailed Student's t-test.

**Supplemental Figure 10. M1 associated gene expression in M1 induced TAM knock-out macrophages. A.** qRT-PCR of M1 genes in macrophages from wildtype, Axl, Tyro3 or Mer knock-out mice treated with IFN $\gamma$  and LPS for 24 hours. (n=5, \*P < 0.05 relative to untreated, †P < 0.05 relative to M1 induced) Data are mean  $\pm$  SEM; P values calculated by 2-tailed Student's t-test.

**Supplemental Figure 11. Pros1 has limited effects on alternative signaling pathways downstream of Mer/Axl/Tyro3. A.** Western blot analysis of pAKT, AKT, pStat1, Stat1, p-Stat6, Stat6, p-MEK, MEK, pERK, and ERK in M1 induced macrophages treated with Pros1 or co-cultured with B16F10 cells. Relative protein quantitation is normalized to untreated Macrophage only controls. B-Tubulin was used as a loading control. (n=3, \*P < 0.05 relative to untreated, †P < 0.05 relative to M1 induced) Data are mean  $\pm$  SEM; P values calculated by 2-tailed Student's t-test.

**Supplemental Figure 12. p-p38 levels are suppressed within 2 hours of Pros1 addition. A.** Naive or M1 induced macrophages were treated with 1 $\mu$ g/ml Pros1 or co-cultured with B16F10 cells, harvested after 2 hours and Western blot analysis conducted. (n=4, \*P < 0.05 relative to M1 induced) Data are mean  $\pm$  SEM; P values calculated by 2-tailed Student's t-test.

**Supplemental Figure 13. Ablation of iNOS gene expression in M1 polarized macrophages using Jak or Stat3 inhibitors. A.** Expression analysis of iNOS mRNA in IFN $\gamma$  + LPS treated macrophages after treatment with Baricitinib or S3I-201. (n=4, \*P < 0.05 relative to IFN $\gamma$  and LPS treatment) Data are mean  $\pm$  SEM; P values calculated by 2-tailed Student's t-test.

**Supplemental Figure 14. p38 and Stat3 expression analysis of M1 induced macrophages in the presence of Pros1. A.** qRT-PCR of M1 polarized macrophages treated with Pros1 or co-cultured with B16F10 cells. (n=4, \*P < 0.05 relative to untreated) Data are mean  $\pm$  SEM; P values calculated by 2-tailed Student's t-test.

**Supplemental Figure 15. M1 gene expression in naïve and M1 induced macrophages treated with p38 and/or Stat3 activator. A.** qRT-PCR of M1 genes in untreated or IFN $\gamma$  and LPS treated macrophages cultured in the presence of Anisomycin (An), Colivelin (Co) or both (An+Co) for 24 hours. (n=5, \*P < 0.05 relative to untreated, †P < 0.05 relative to M1 induced) Data are mean  $\pm$  SEM; P values calculated by 2-tailed Student's t-test.

**Supplemental Figure 16. M1 gene expression in naïve and M1 induced macrophages treated with PTP1b inhibitors. A.** qRT-PCR of M1 genes in untreated or IFN $\gamma$  and LPS treated macrophages cultured in the presence of BVT948, PTP Inhibitor III or NSC87877 for 24 hours. (n=5, \*P < 0.05 relative to untreated, †P < 0.05 relative to M1 induced) Data are mean  $\pm$  SEM; P values calculated by 2-tailed Student's t-test.

**Supplemental Figure 17. TAM expression on intra-tumoral macrophages. A.** Flow cytometric analysis of TAM receptors on F4/80(+) macrophages isolated from B16F10 or BdP tumors. (n=8, \*P < 0.05 relative to B16F10) Data are mean  $\pm$  SEM; P values calculated by 2-tailed Student's t-test.

**Supplemental Figure 18. Labeling efficiency of Lyz2-Cre:tdTomato macrophages. A.** Immunostaining of peritoneal macrophages isolated from Lyz2-Cre:tdTomato mice for the macrophage marker F4:80. (n=5, 1052 cells counted, 2 independent replicates) **B.** Immunostaining of untreated and M1 induced Lyz2-Cre:tdTomato macrophages for the M1 markers iNOS and IL1. (n=3) **C.** Immunostaining of intra-tumoral Lyz2-Cre:tdTomato cells for F4:80. (n=5, 2 independent replicates) (scale bar for **A**, **B**, and **C** 20 $\mu$ m) Data are mean  $\pm$  SEM; P values calculated by 2-tailed Student's t-test.

**Supplemental Figure 19. Pros1 expression and genetic alterations in Human cancer. A.** Pros1 expression across Human tumor types. **B.** Mutation frequency of Pros1 in Human tumor types.

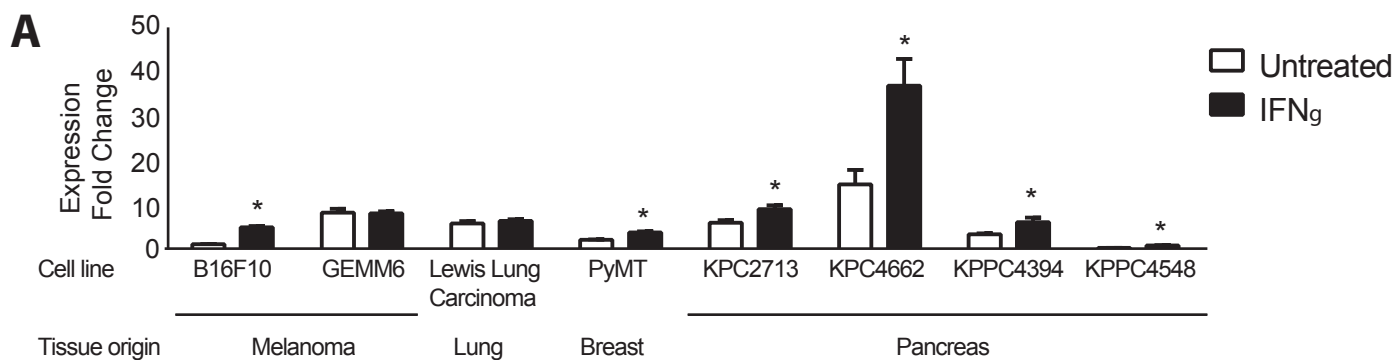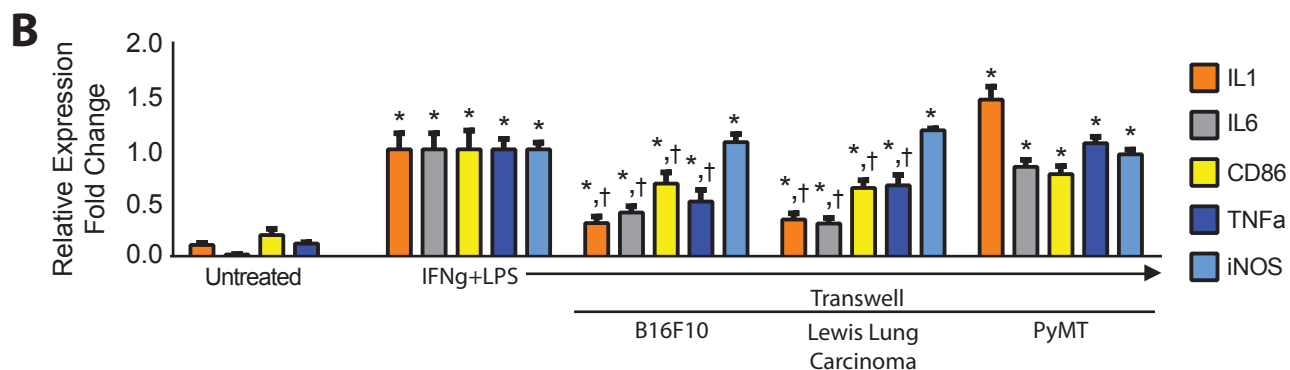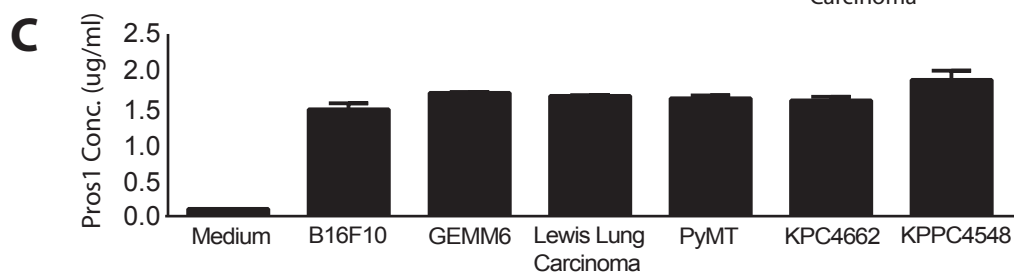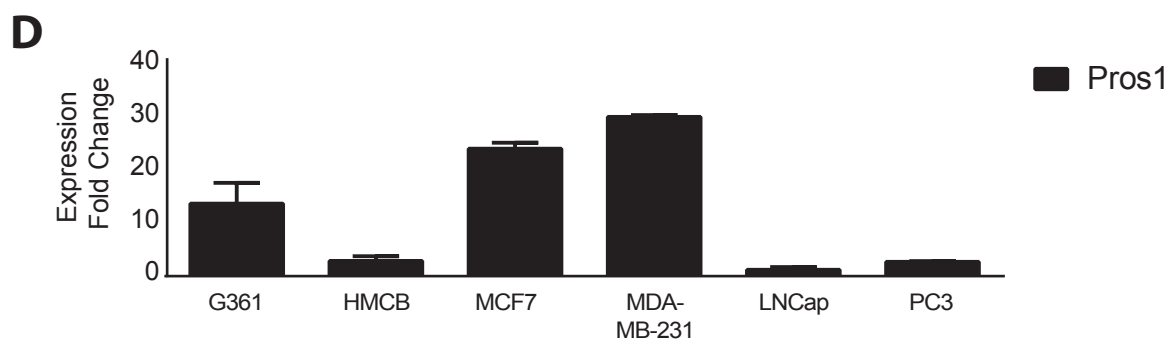

**A**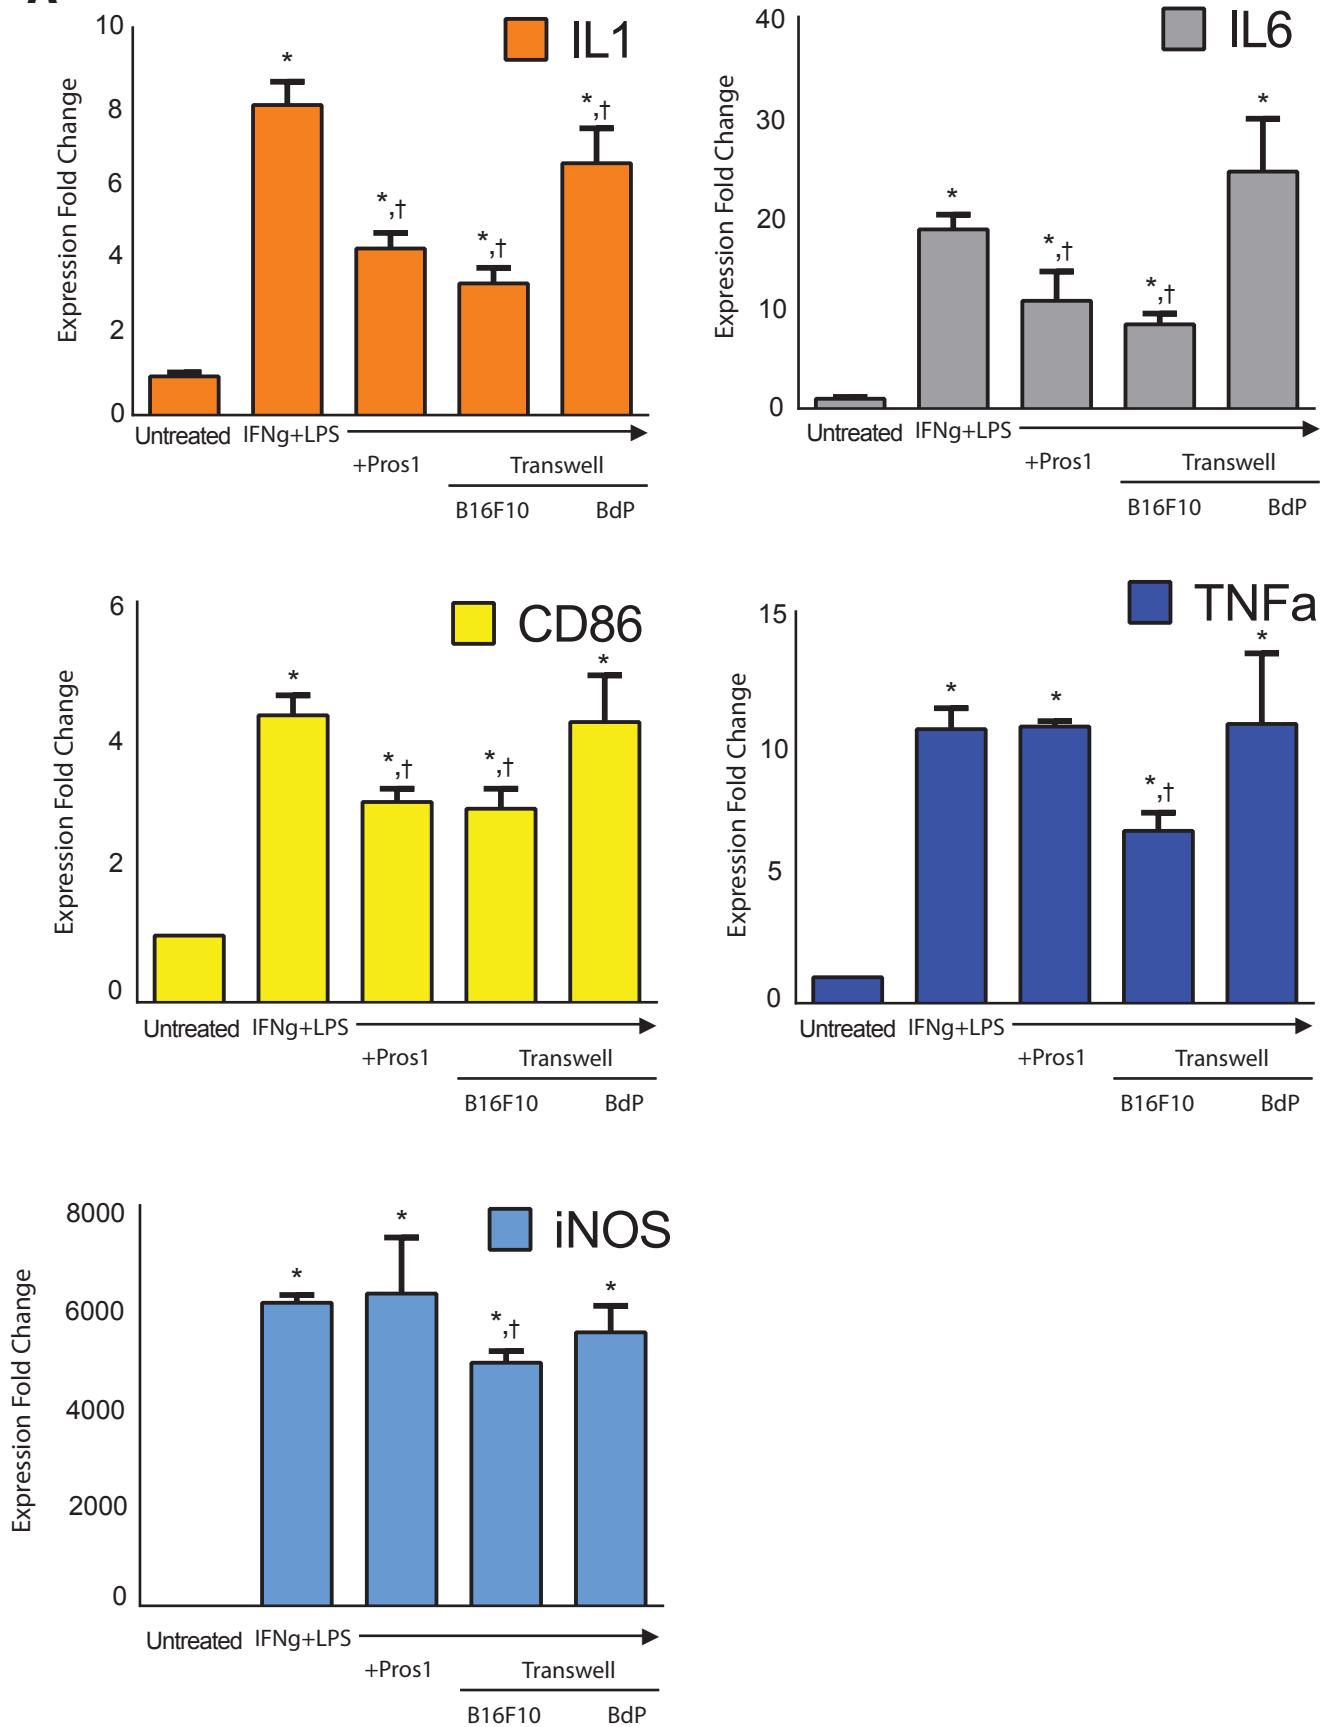

**A**

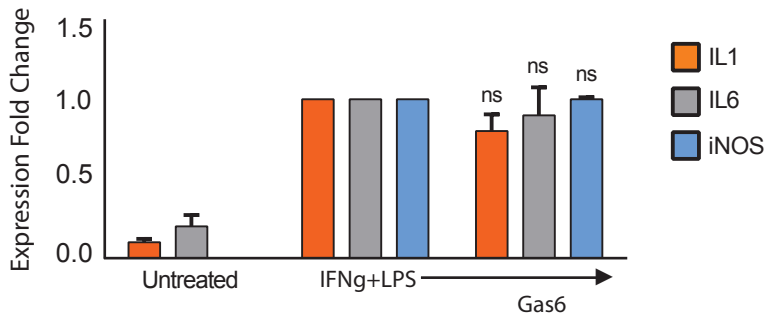

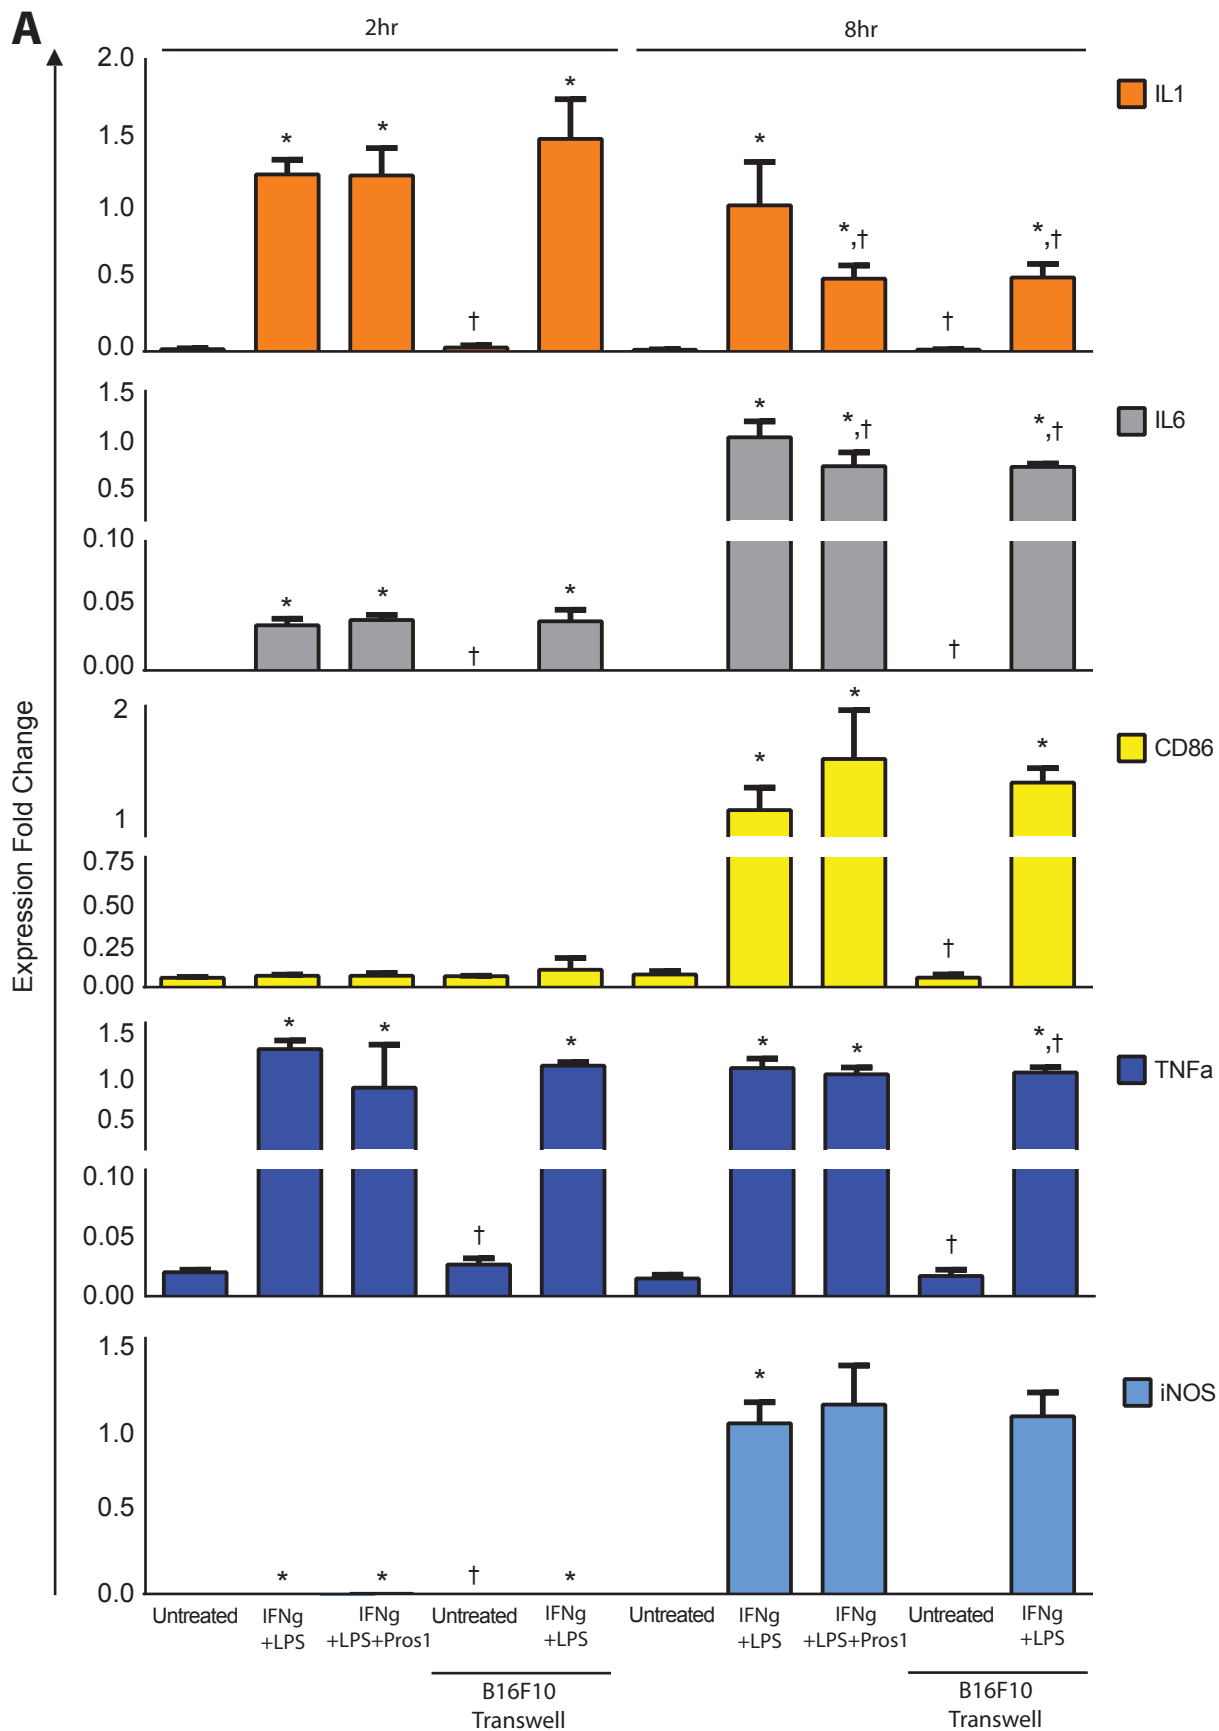

**Supplemental Figure 4**

**A**

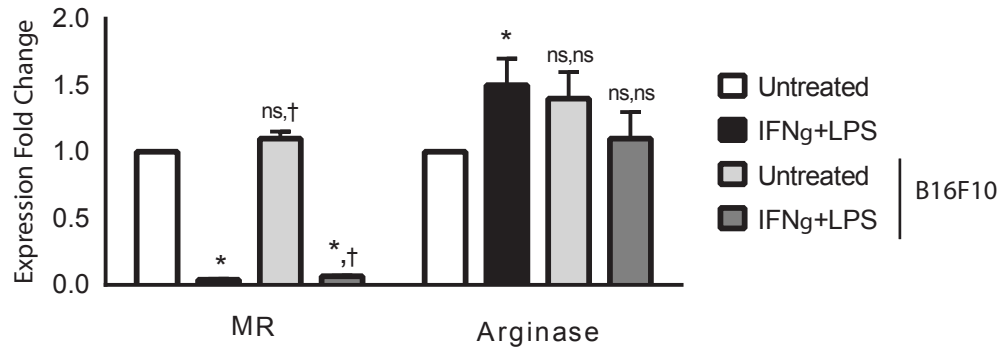



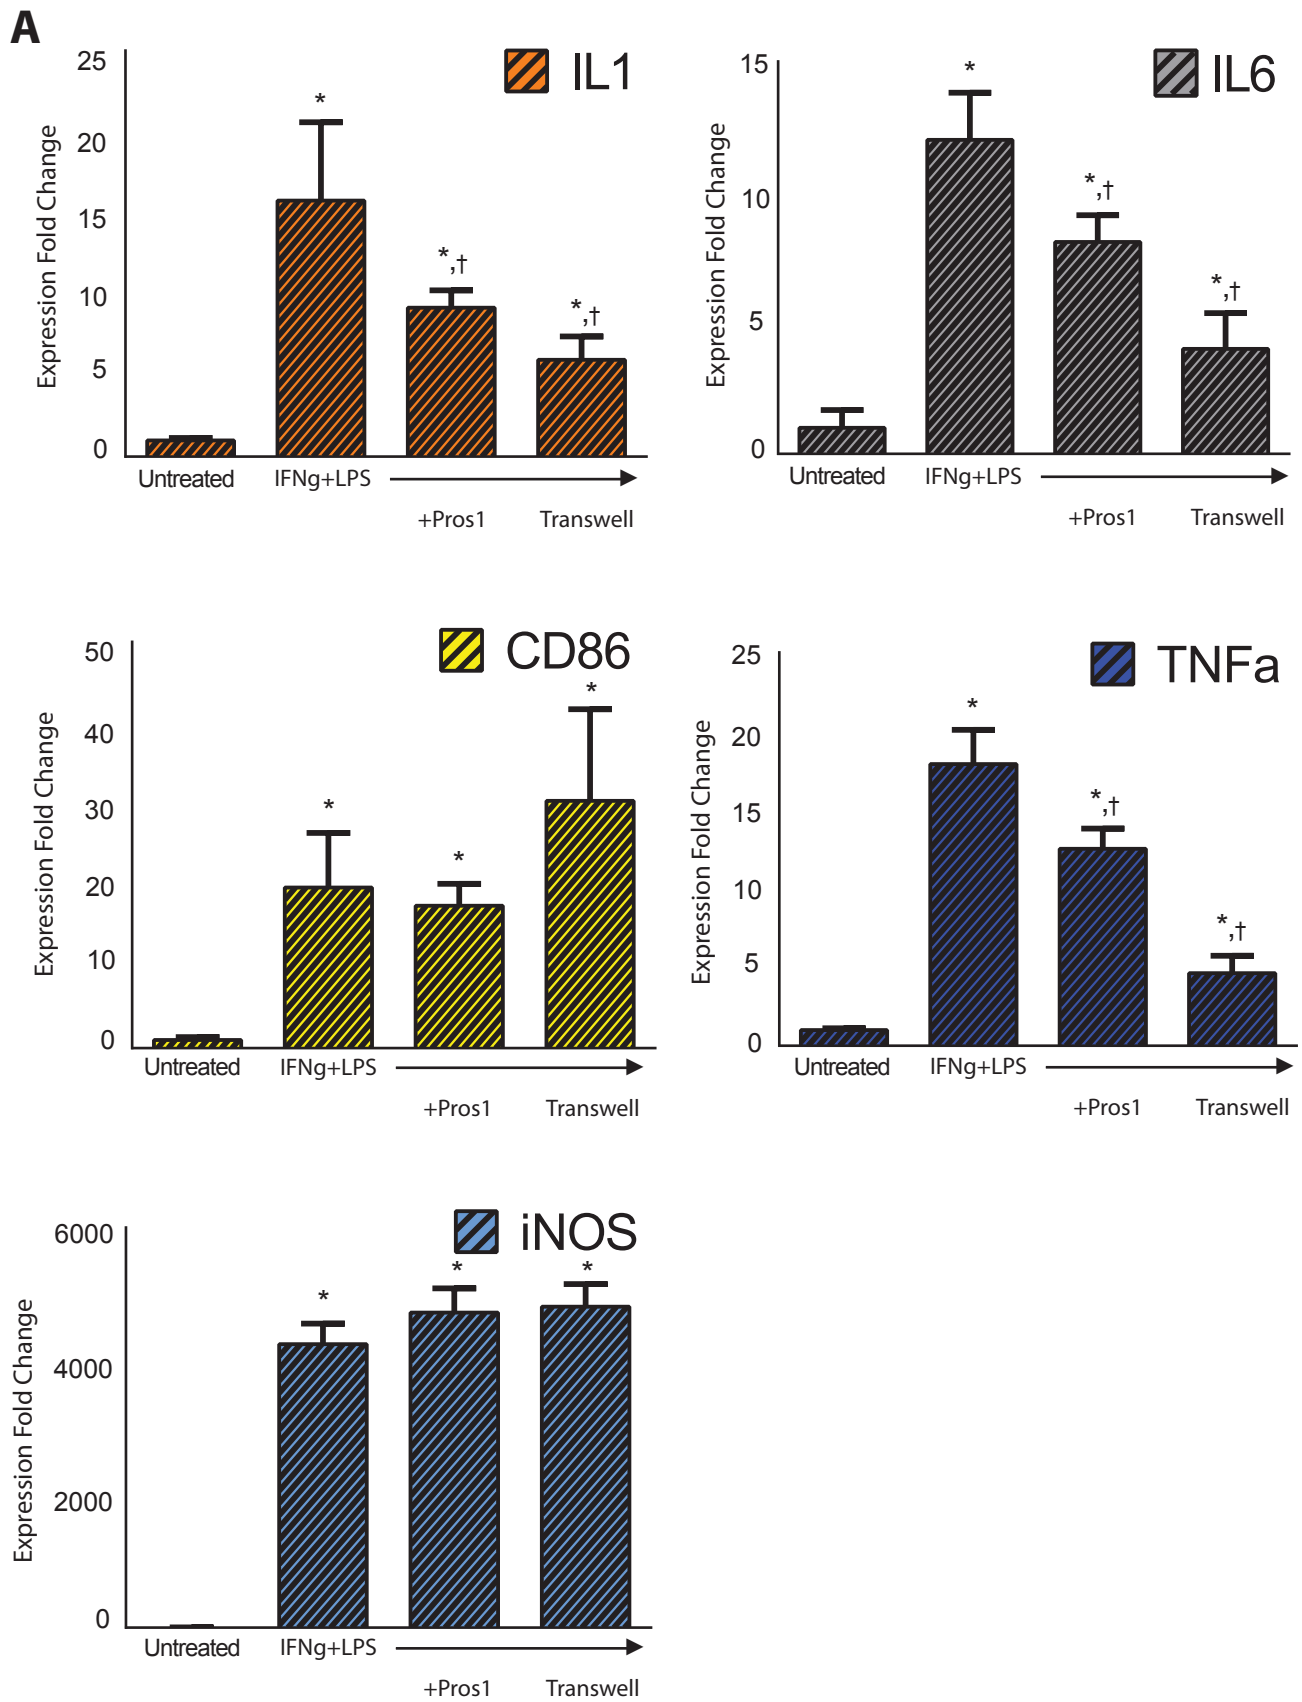

**Supplemental Figure 6**

**A****Mus musculus protein S (alpha) (Pros1), mRNA**Sequence ID: [reflNM\\_011173.3](#) Length: 3314 Number of Matches: 1Range 1: 199 to 357 [GenBank](#) [Graphics](#)

▼ Next Match ▲ Previous Match

| Score         | Expect                                                        | Identities   | Gaps      | Strand     |
|---------------|---------------------------------------------------------------|--------------|-----------|------------|
| 281 bits(152) | 3e-79                                                         | 157/159(99%) | 2/159(1%) | Plus/Minus |
| Query 61      | CCGTCCTCGGGATTATTTTCAAAGACCTCCCTGGCTTCCTCCTTATTGCAGAGTTCTTCAA | 120          |           |            |
| Sbjct 357     | CCGTCCTCGGGATTATTTTCAAAGACCTCCCTGGCTTCCTCCTTATTGCAGAGTTCTTCAA | 298          |           |            |
| Query 121     | TGCACCTCTCGTTCAAGGTTGCCCTT--TAGTTTCTTCGAACAAGGTATTTCACGGCGCT  | 178          |           |            |
| Sbjct 297     | TGCACCTCTCGTTCAAGGTTGCCCTTCATAGTTTCTTCGAACAAGGTATTTCACGGCGCT  | 238          |           |            |
| Query 179     | TCCTCACCAGGACTTGTGAAGCACGCTCTTTGGACAAGA                       | 217          |           |            |
| Sbjct 237     | TCCTCACCAGGACTTGTGAAGCACGCTCTTTGGACAAGA                       | 199          |           |            |

**B****Phosphatidylserine binding**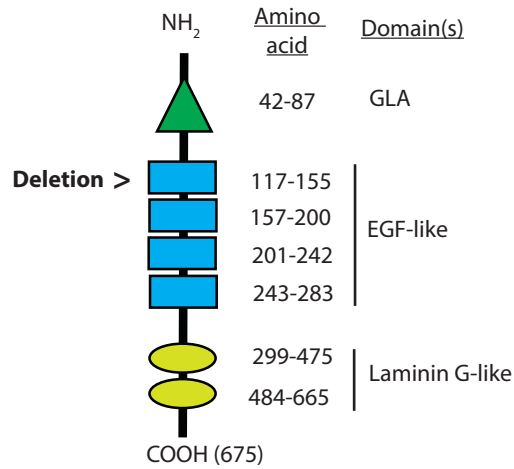**TAM binding/activation****C**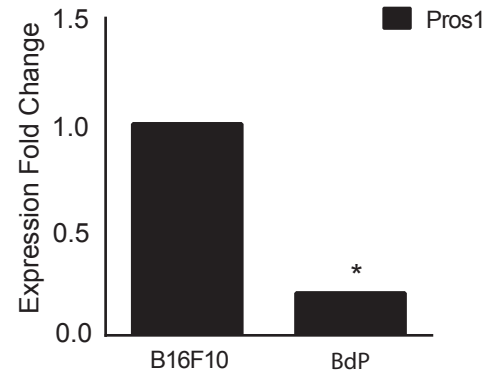**D**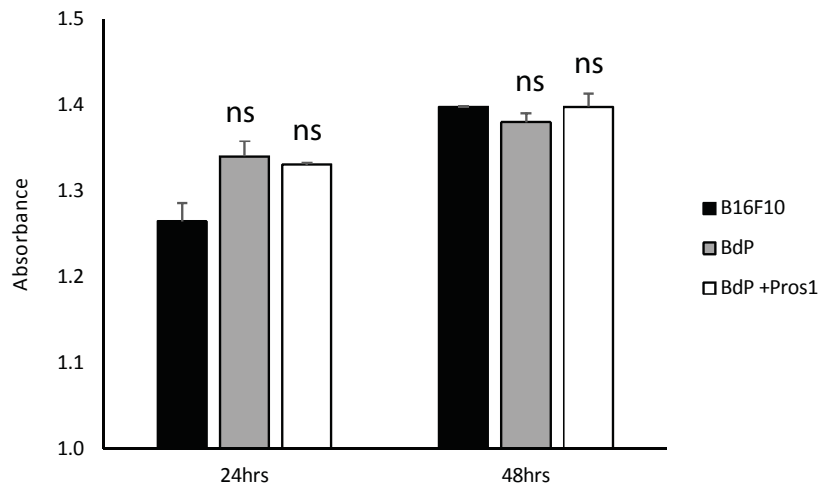

**A**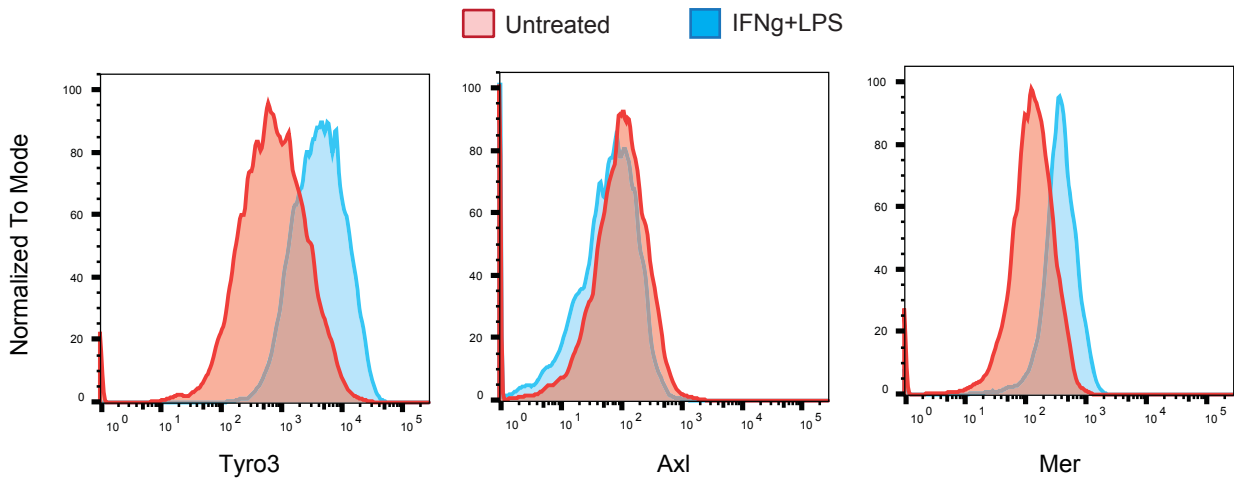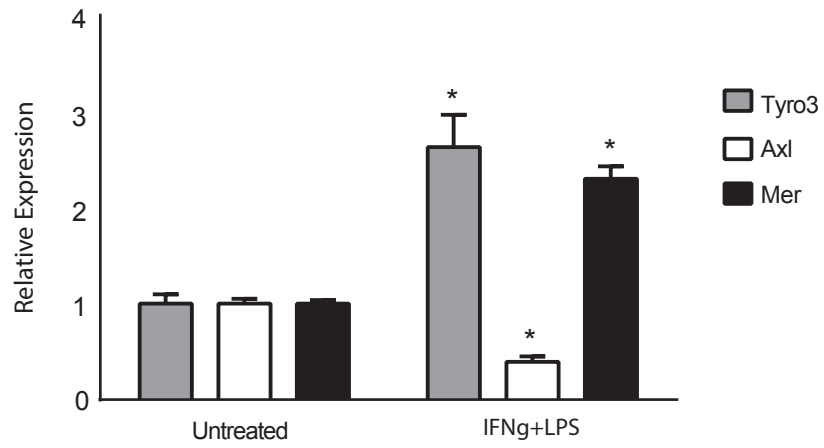

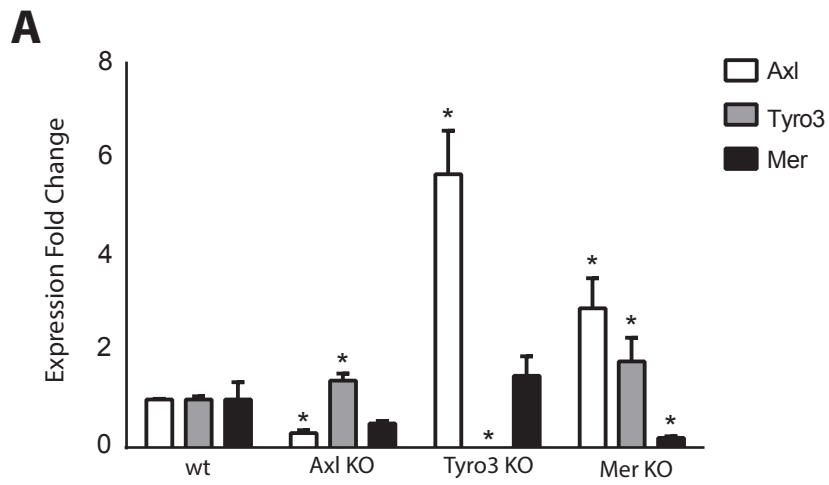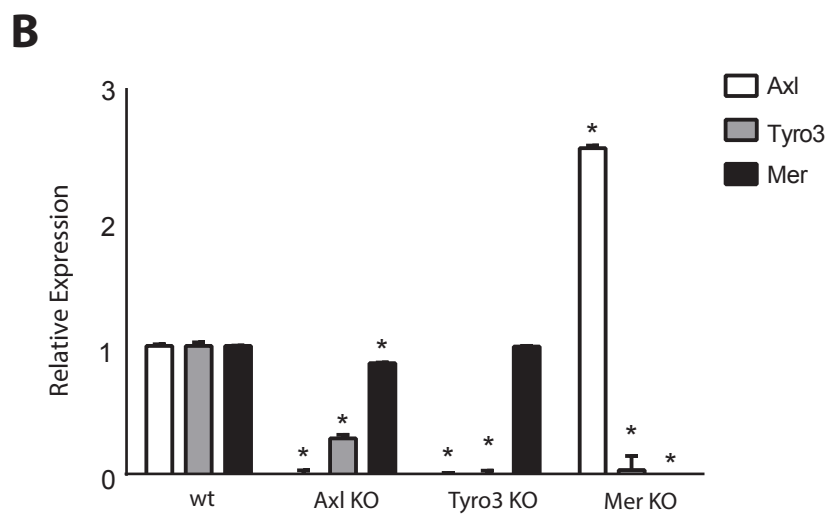

**A**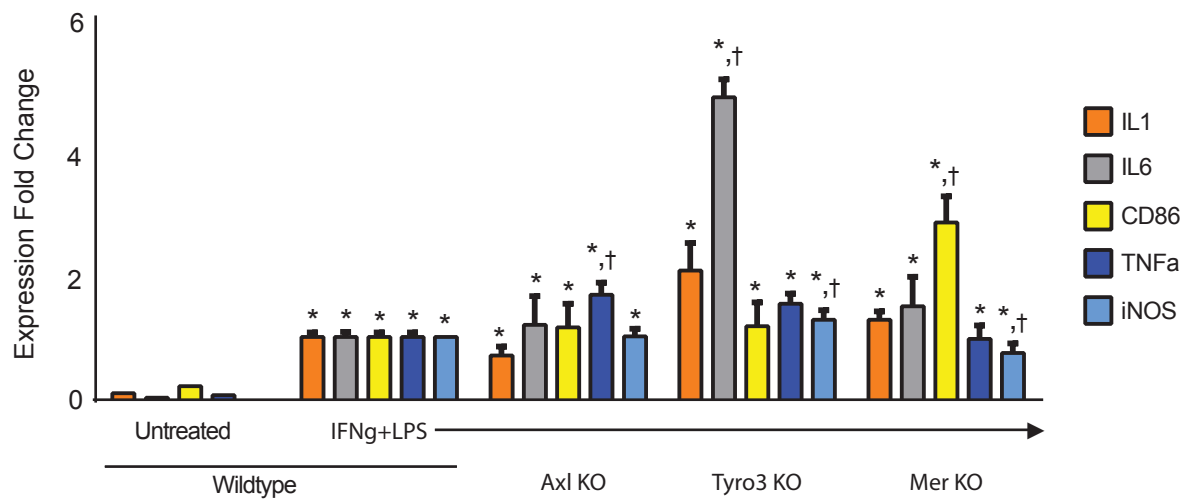

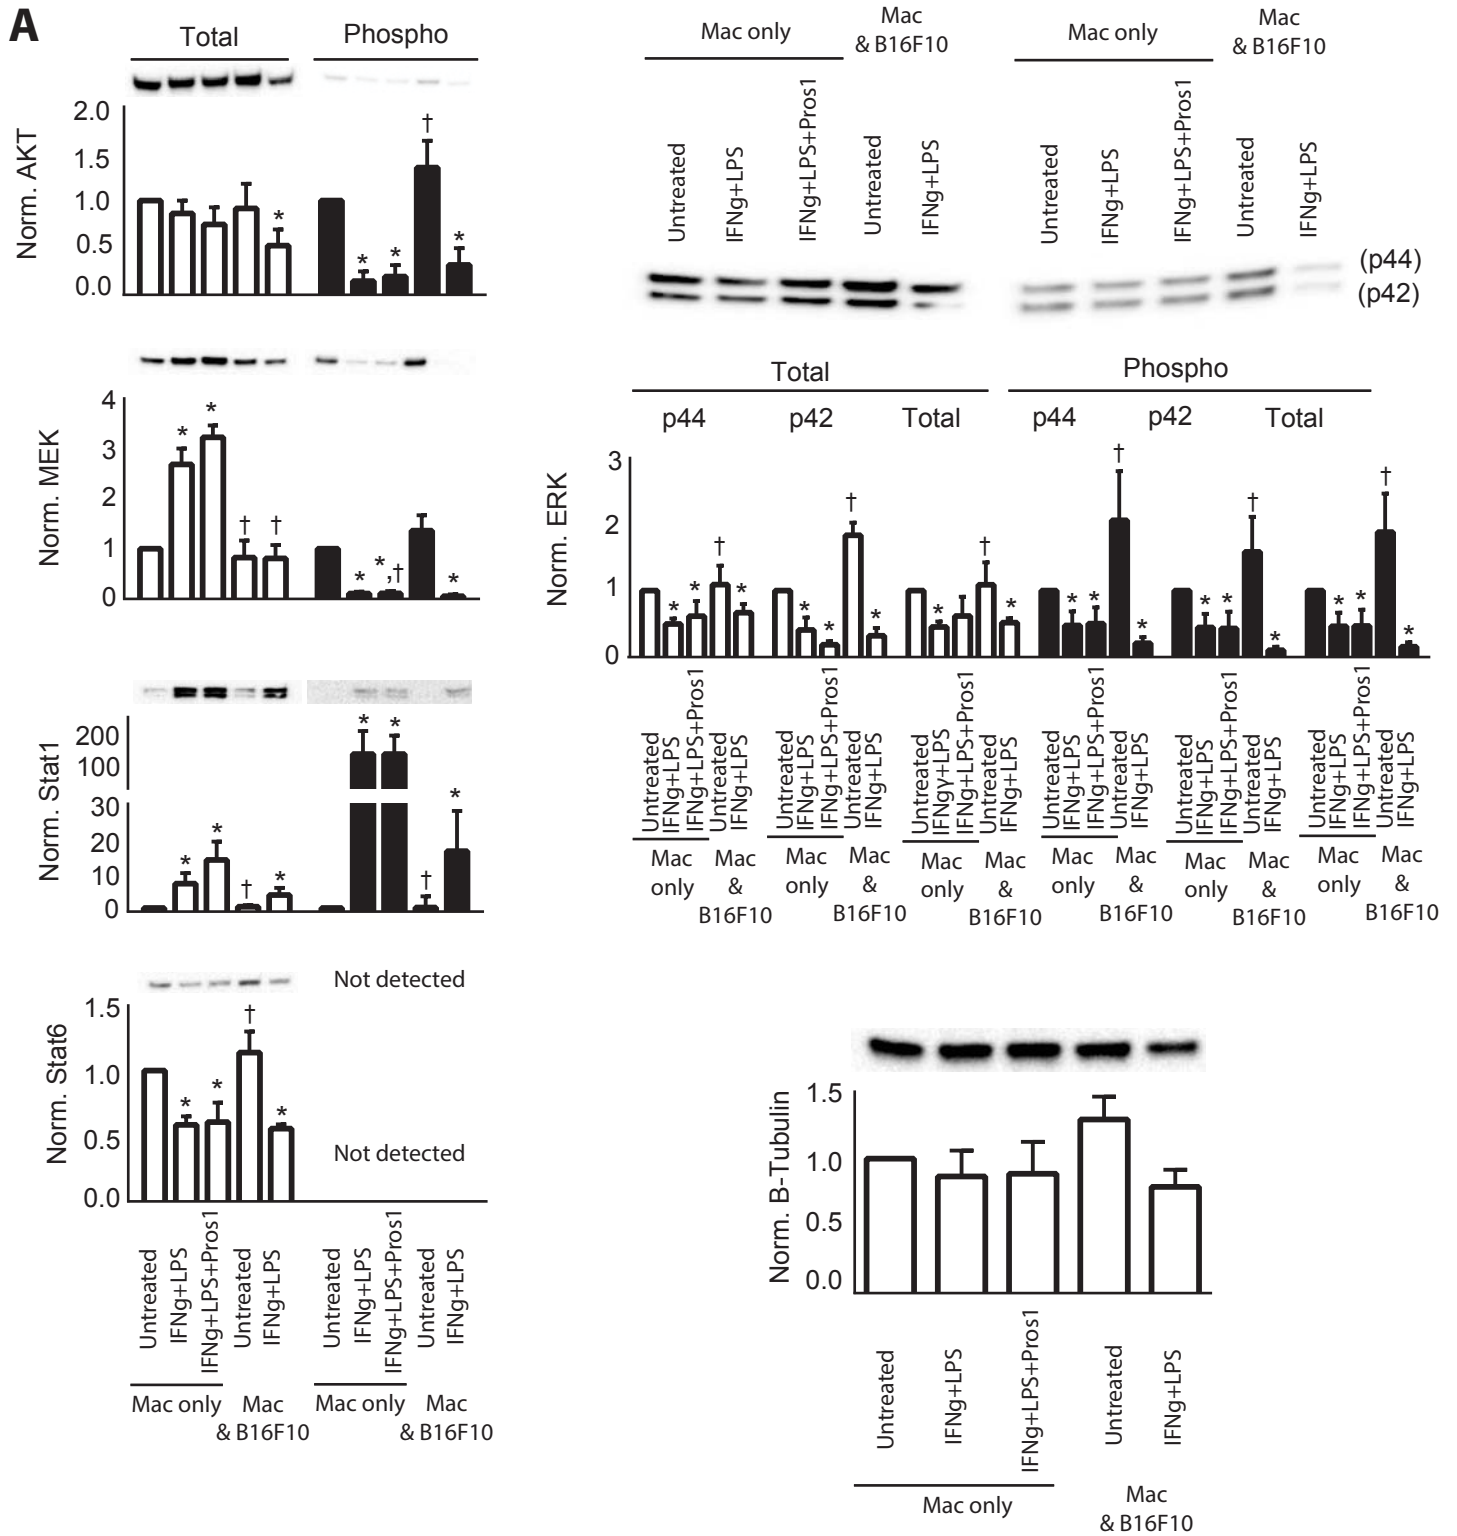

**Supplemental Figure 11**

**A**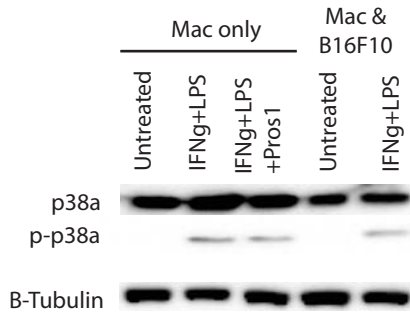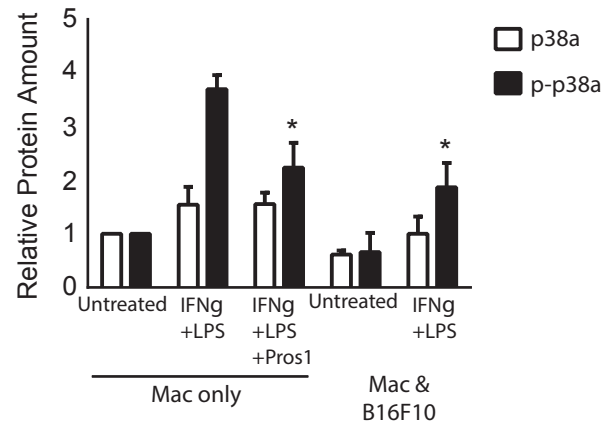

**A**

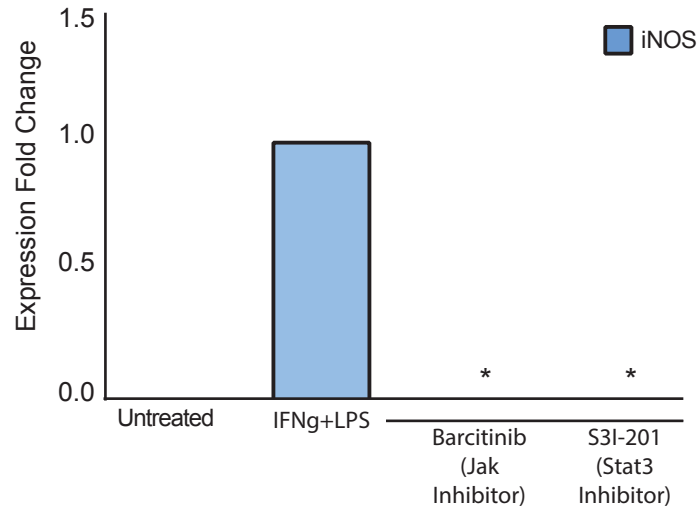



**A**

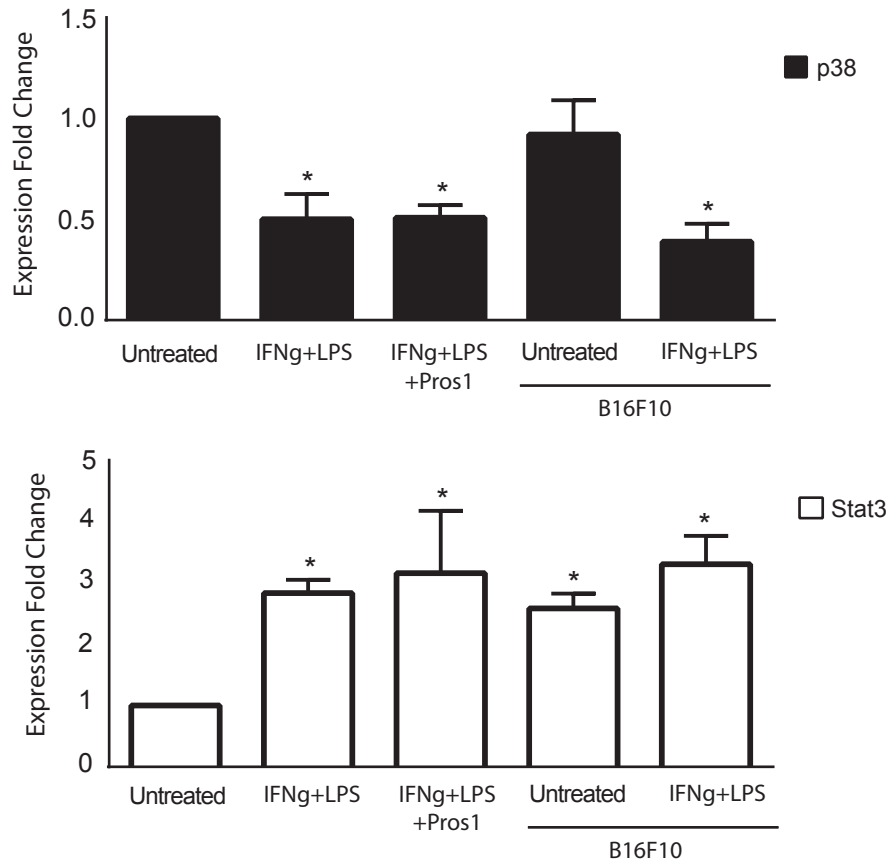

**A**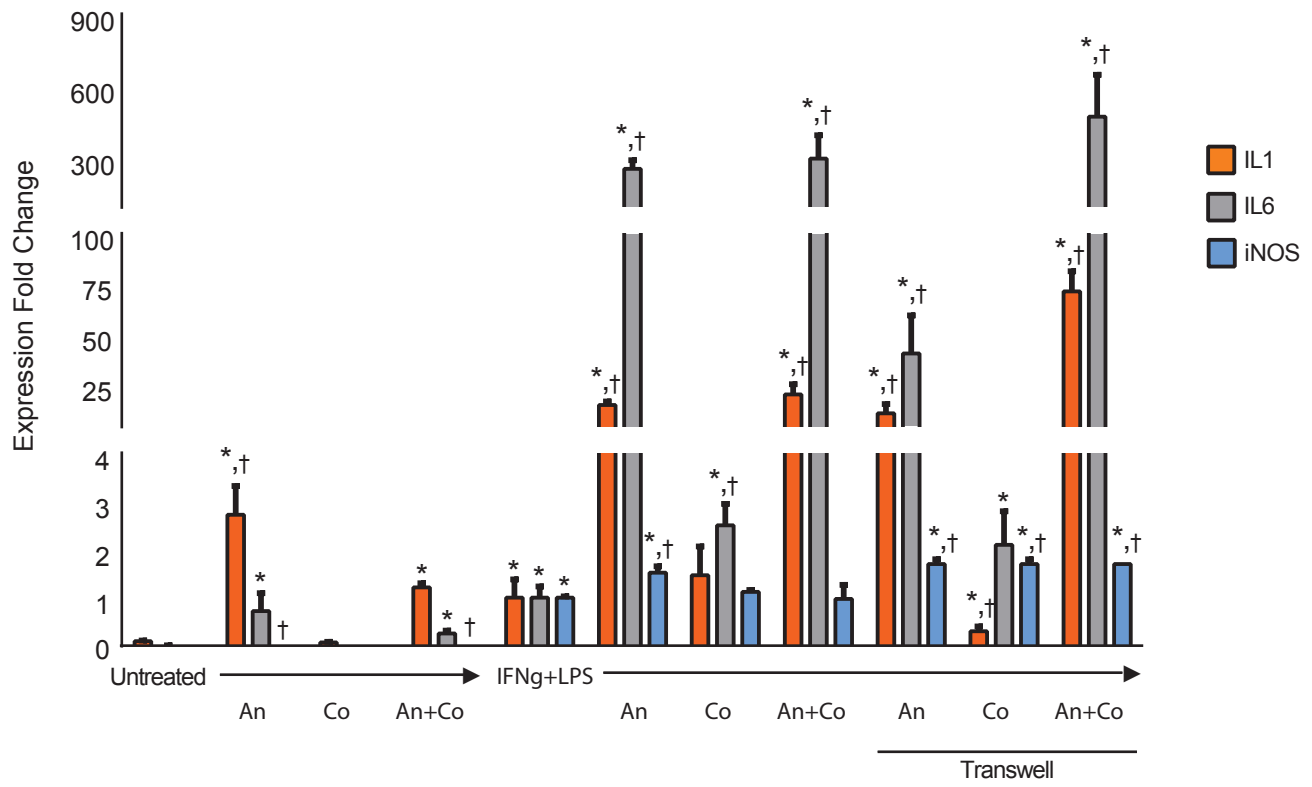

**A**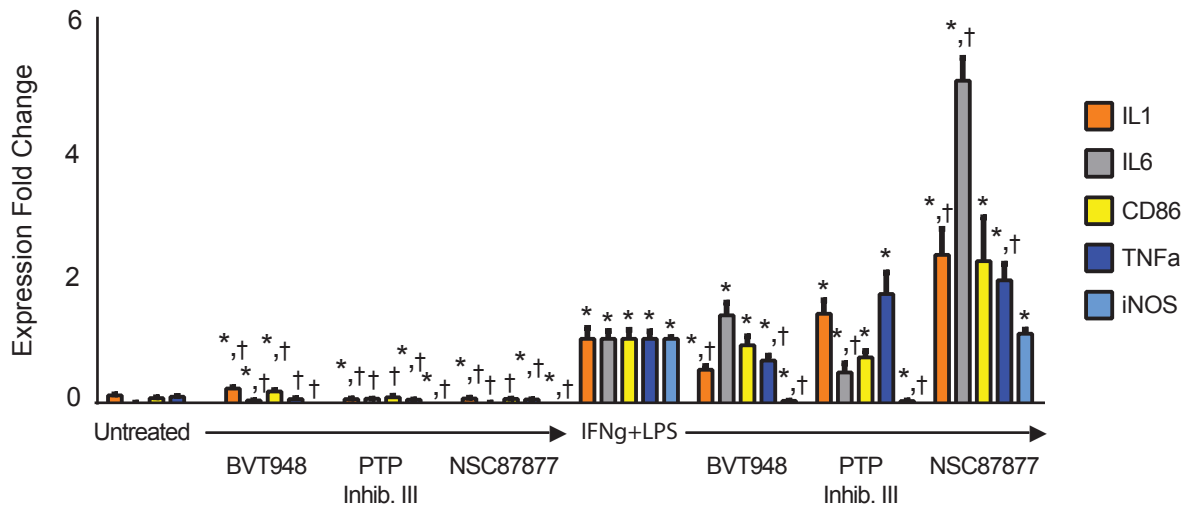

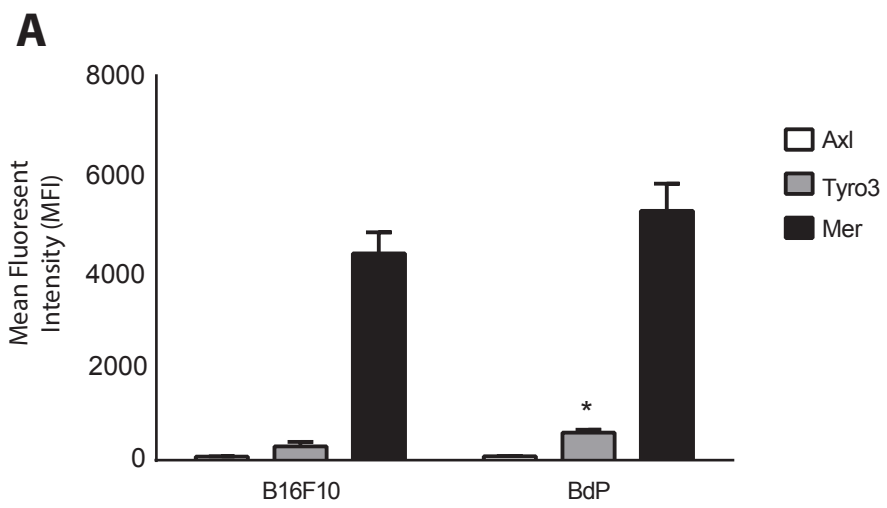

**A**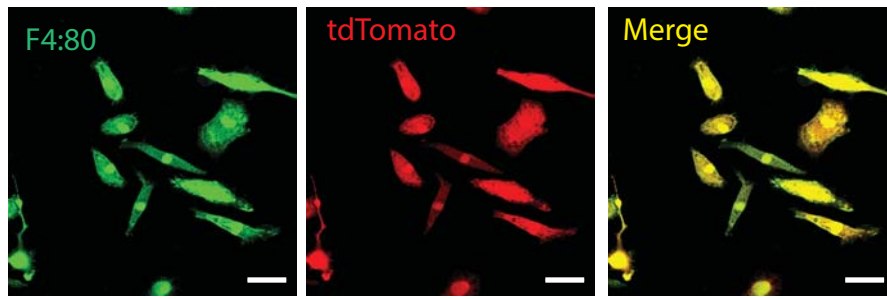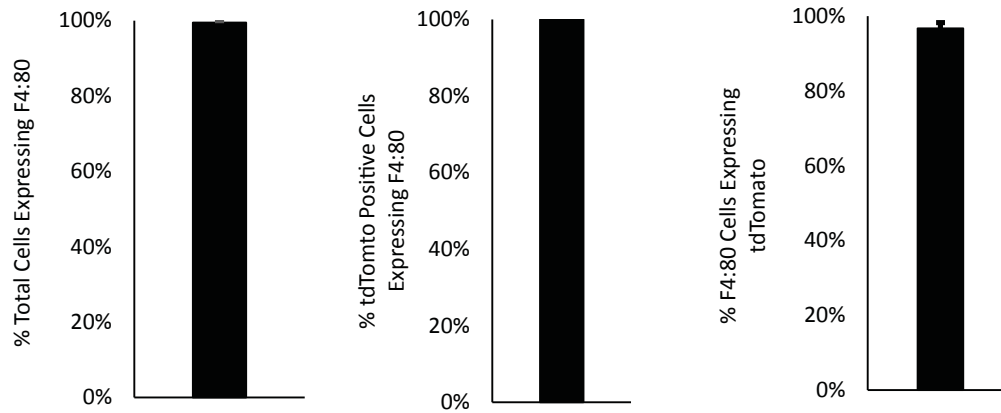**B**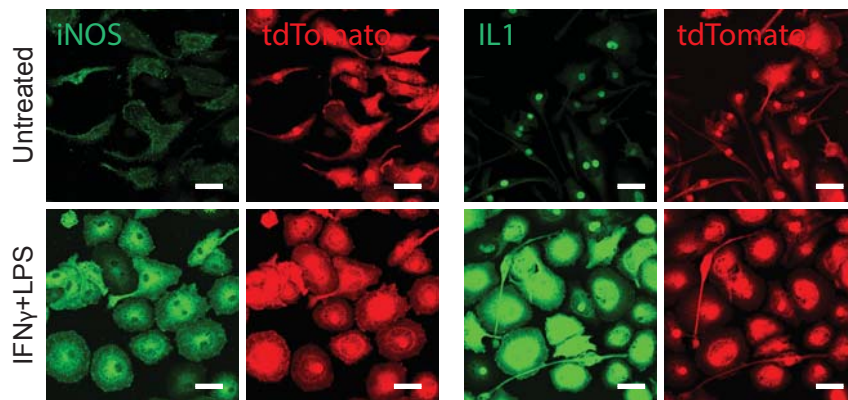**C**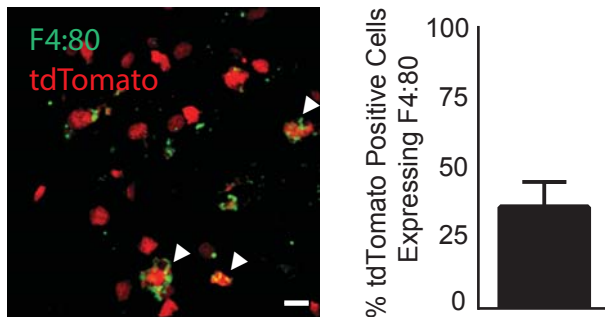

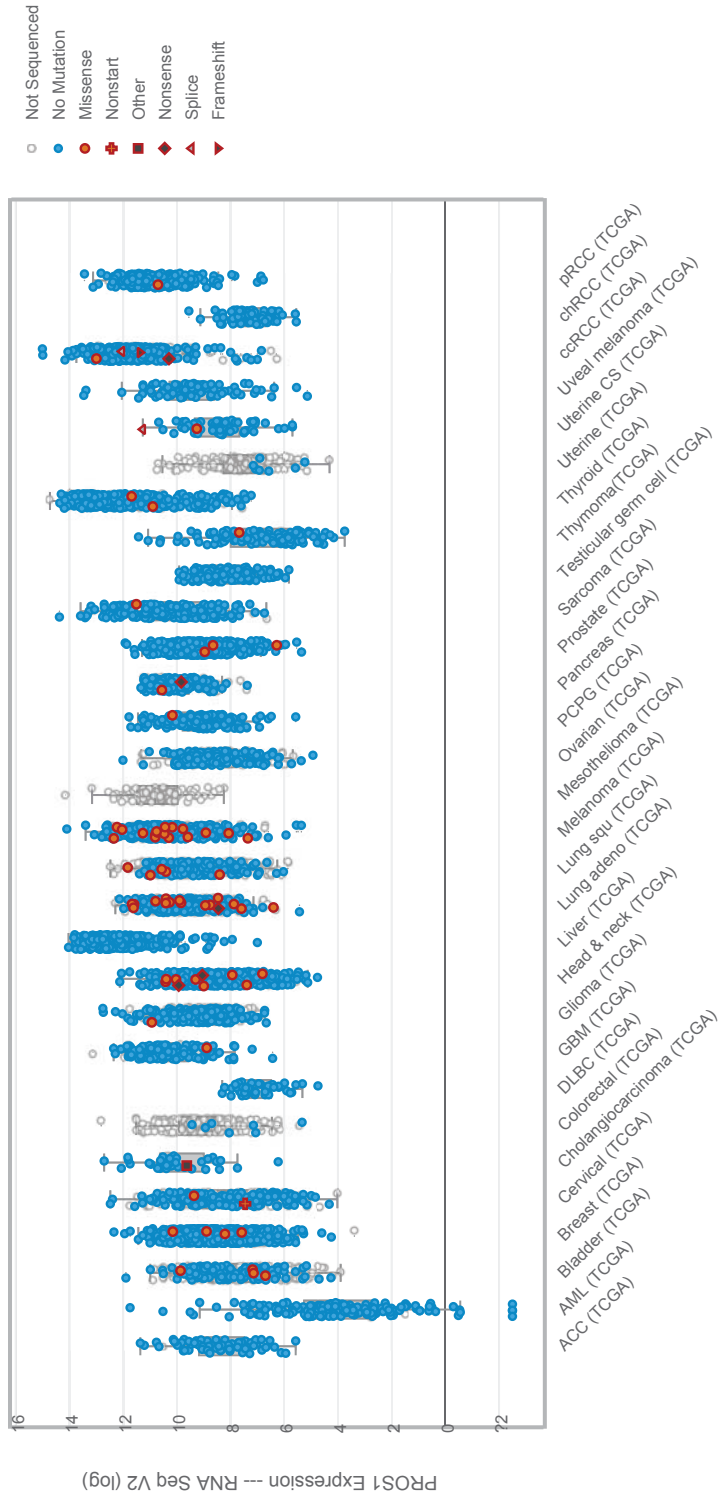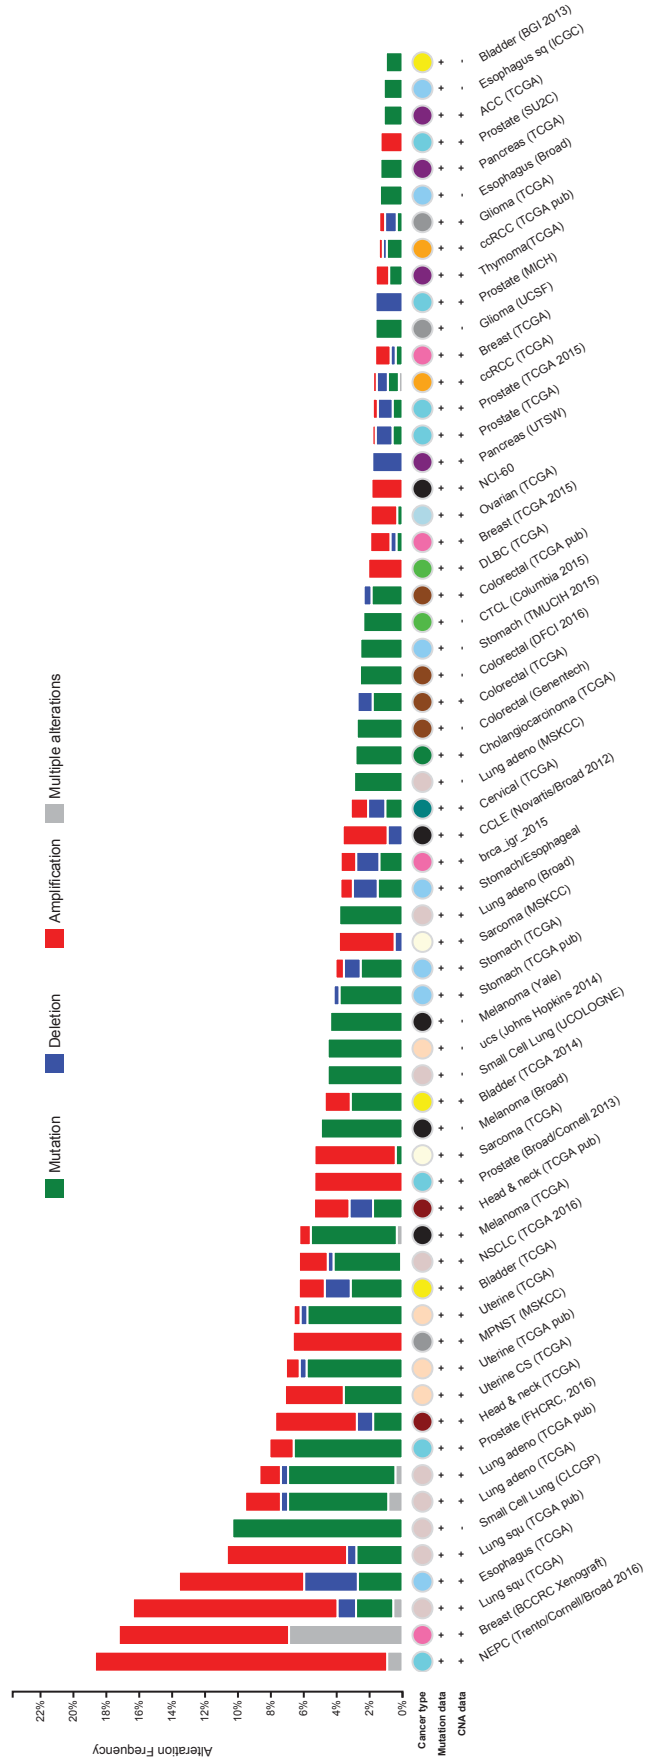

A

B
